# Supplementary material for: Aortic Pulse Wave Velocity as a Measure of Cardiovascular Risk in Chronic Obstructive Pulmonary Disease: Two-Year Follow-Up Data from the ARCADE Study
Source: PubMed Central journal article supplement (PMC6524022; doi:10.3390/medicina55040089), 2019-04-02
Supplement: medicina-55-00089-s001.pdf [file medicina-55-00089-s001.pdf]

Supplementary data

**Table S1.** Baseline Characteristics of Patients with COPD and Comparators who completed or did not complete the 2 year assessment.

|                                   | <b>COPD<br/>complete<br/>n=301</b> | <b>COPD<br/>non-complete<br/>n=219</b> | <b>Comparator<br/>complete<br/>n=105</b> | <b>Comparator<br/>non-complete<br/>n=45</b> |
|-----------------------------------|------------------------------------|----------------------------------------|------------------------------------------|---------------------------------------------|
| Age (years)                       | 66.4 ± 7.1                         | 65.7 ± 8.2                             | 66 ± 7                                   | 64 ± 8                                      |
| Male n (%)                        | 156 (51.8%)                        | 114 (52.1%)                            | 54 (51.4%)                               | 22 (48.9%)                                  |
| BMI (Kg/m <sup>2</sup> )          | 27.8 ± 5.2                         | 28.4 ± 6.0                             | 28.0 ± 4.0                               | 28.2 ± 4.5                                  |
| FEV <sub>1</sub> (L)              | 1.41 ± 0.59                        | 1.44 ± 0.61                            | 2.75 ± 0.71                              | 2.72 ± 0.59                                 |
| FVC (L)                           | 2.69 ± 0.89                        | 2.65 ± 0.92                            | 3.52 ± 0.96                              | 3.54 ± 0.75                                 |
| FEV <sub>1</sub> /FVC (L)         | 0.52 ± 0.12                        | 0.54 ± 0.10                            | 0.79 ± 0.05                              | 0.77 ± 0.05                                 |
| FEV <sub>1</sub> (% of predicted) | 57 ± 19                            | 59 ± 19                                | 106 ± 14                                 | 104 ± 12                                    |
| FVC (% of predicted)              | 87 ± 21                            | 86 ± 21                                | 109 ± 16                                 | 110 ± 14                                    |
| Smoking (pack years)              | 40 ± 27                            | 41 ± 23                                | 21 ± 18                                  | 23 ± 20                                     |
| Current smokers, n (%)            | 88 (29%)                           | 95 (43%)                               | 18 (17%)                                 | 8(17%)                                      |
| mMRC (median [IQR])               | 2 [1-3]                            | 2 [1-3]                                | -                                        | -                                           |
| No.Exac Yr (median [IQR])         | 2 [1-3]                            | 2 [1-3]                                | -                                        | -                                           |
| Resting O <sub>2</sub> (%)        | 97 ± 2                             | 97 ± 2                                 | 98 ± 1                                   | 98 ± 1                                      |
| 6MWD (m)                          | 350 ± 116                          | 313 ± 134                              | 505 ± 83                                 | 496 ± 92                                    |
| aPWV (m/s)                        | 10.0 ± 2.3                         | 9.9 ± 2.5                              | 8.4 ± 1.7                                | 8.5 ± 2.1                                   |
| Peripheral SBP (mmHg)             | 147 ± 19                           | 145 ± 18                               | 140 ± 18                                 | 141 ± 19                                    |
| Peripheral DBP (mmHg)             | 82 ± 10                            | 82 ± 11                                | 80 ± 9                                   | 82 ± 7                                      |
| Central MAP (mmHg)                | 98 ± 11                            | 97 ± 11                                | 95 ± 11                                  | 95 ± 9                                      |
| Heart Rate (bpm)                  | 74 ± 11                            | 75 ± 12                                | 67 ± 10                                  | 69 ± 11                                     |
| Fibrinogen (g/L) #                | 3.5 ± 1.3                          | 3.5 ± 1.3                              | 3.1 ± 1.3                                | 3.0 ± 1.3                                   |
| HsCRP (mg/L) #                    | 3.1 ± 3.0                          | 3.9 ± 2.9                              | 1.8 ± 3.0                                | 1.5 ± 3.4                                   |

Data are Mean ±SD unless stated, # geometric mean p<0.05 significant difference between groups  
aPWV= aortic pulse wave velocity, 6MWD= six minute walk distance, BMI= body mass index, FEV<sub>1</sub>, forced expiratory volume in 1 second, FVC= forced vital capacity, mMRC= modified medical research council breathlessness, SBP= systolic blood pressure, DBP= diastolic blood pressure, pressure, MAP= mean arterial pressure.
